# Supplementary material for: The deubiquitinating enzyme STAMBP is a newly discovered driver of triple-negative breast cancer progression that maintains RAI14 protein stability
Source: PubMed Central journal article supplement (PMC9723177; doi:10.1038/s12276-022-00890-1), 2022-11-25
Supplement: 12276_2022_890_MOESM1_ESM.pdf [file 12276_2022_890_MOESM1_ESM.pdf]

1 The deubiquitinating enzyme STAMPB is a newly discovered driver of triple-negative  
2 breast cancer progression that maintains RAI14 protein stability

3

4 **Supplementary figures and figure legends**

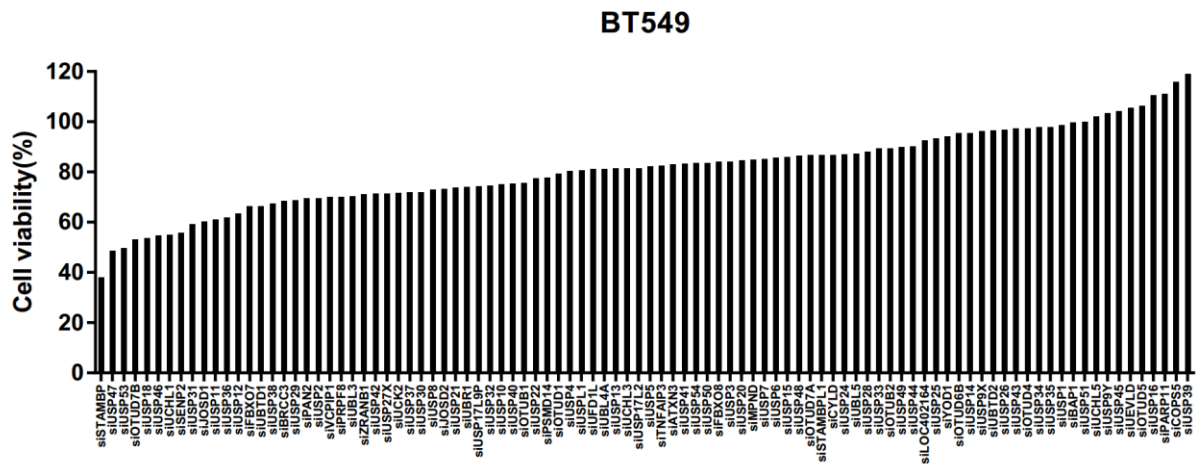

5

6 **Supplementary Fig. 1 Effects of knockdown of DUBs on cell proliferation of BT549 cells.**

7 BT549 cells were transfected with 96 deubiquitinase siRNA respectively for 72 h, and then  
8 cell proliferation was determined by MTS assay.

9

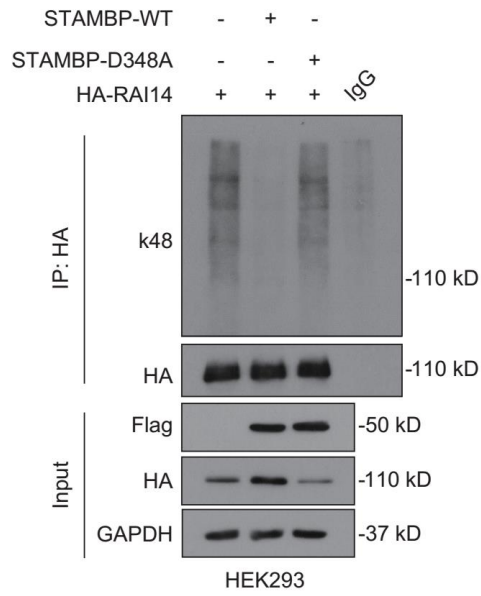

10

11 **Supplementary Fig. 2 STAMBP D348A mutant fails to deubiquitinate RAI14.**

12 HEK293 cells transiently transfected with HA-RAI14, STAMBP-WT or STAMBP-D348A

13 plasmid were treated with MG132 for 6 h. The extracts were immunoprecipitated with

14 anti-HA antibody and immunoblotted with the indicated antibody.

15

16

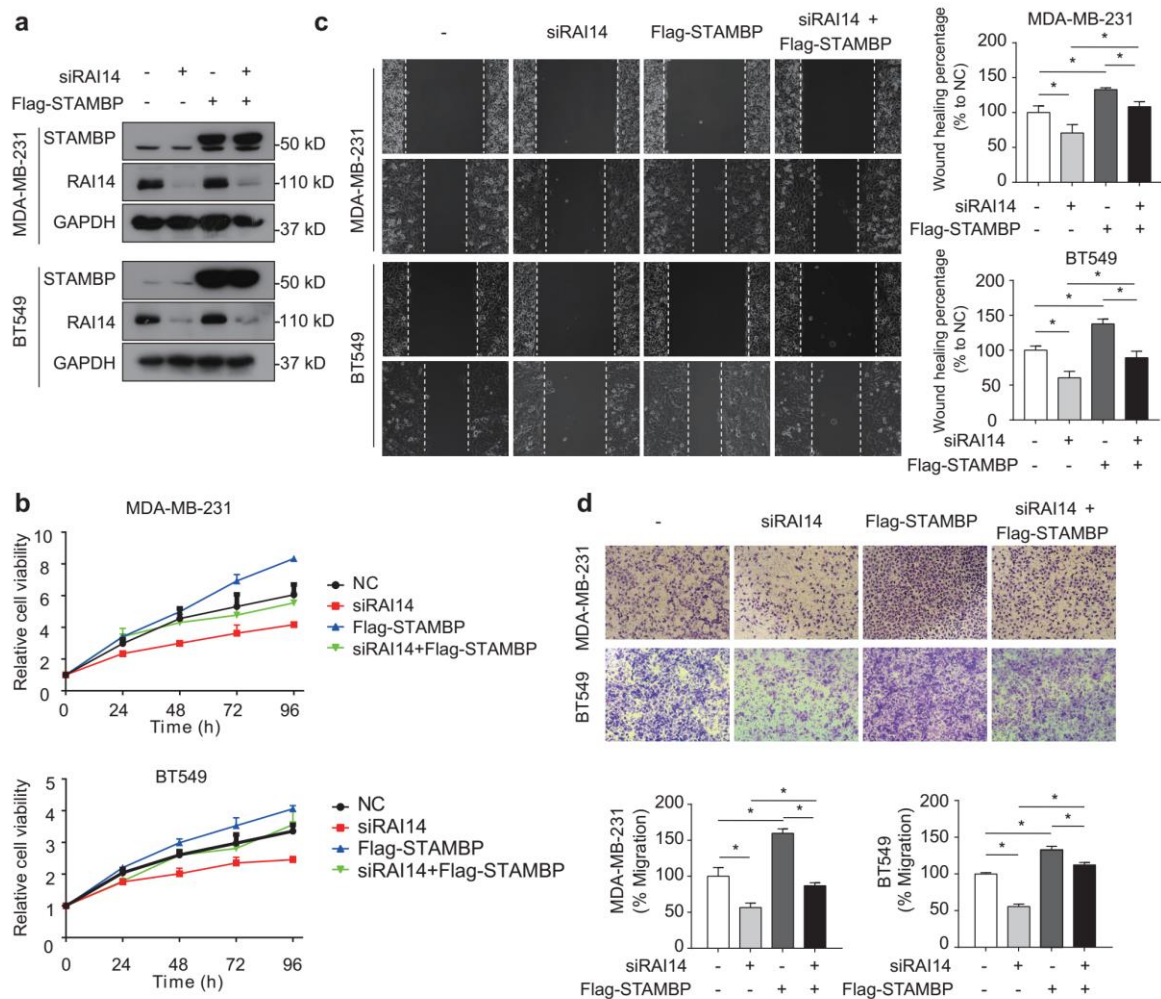

17

18 **Supplementary Fig. 3 STAMBP-RAI14 pathway promotes cell proliferation, migration,**  
 19 **and invasion of TNBC.**

20 **a** MDA-MB-231 and BT549 cells stably transfected with flag-STAMBP were transfected with  
 21 RAI14 siRNA or control siRNAs. RAI14 and STAMBP expression in cells was measured by  
 22 Western blot. **b-d** Cell proliferation, migration, and invasion of the indicated MDA-MB-231  
 23 and BT549 cells were determined by MTS assays (**b**), wound healing assays (**c**), and transwell  
 24 migration assays (**d**), respectively. Representative images are shown. Wound healing  
 25 percentage and migration percentage were counted with Image-Pro Plus 7 software. Mean  $\pm$   
 26 SD (n = 3). \*p < 0.05.

27

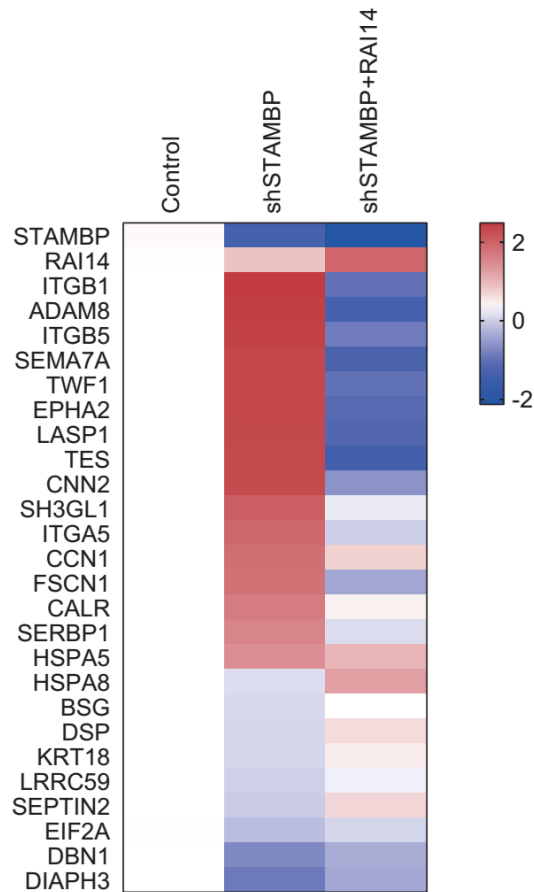

28

29 **Supplementary Fig. 4 STAMBP regulates cell adhesion pathway by regulating RAI14.**

30 MDA-MB-231 were stably transfected with STAMBP shRNA #1 or HA-RAI14. Expression  
 31 of the indicated genes in cells was measured by qPCR analysis. Gene expression levels are  
 32 normalized to control cells (100%).

33

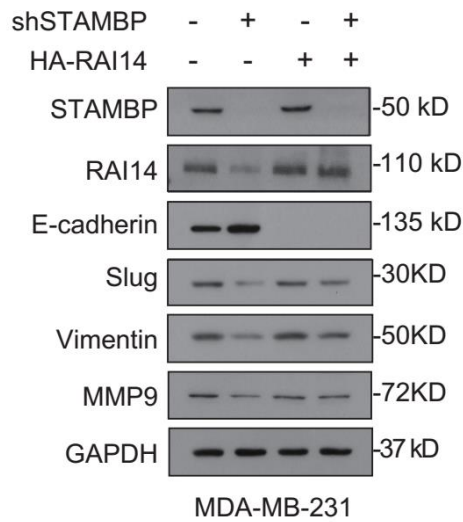

34

35 **Supplementary Fig. 5 STAMBP promotes EMT by regulating RAI14.**

36 MDA-MB-231 cells stably transfected with STAMBP shRNA #1 or control shRNA were  
 37 stably expressed with HA-RAI14 or vector. Expression of the indicated proteins was  
 38 measured by Western blot.

39

40

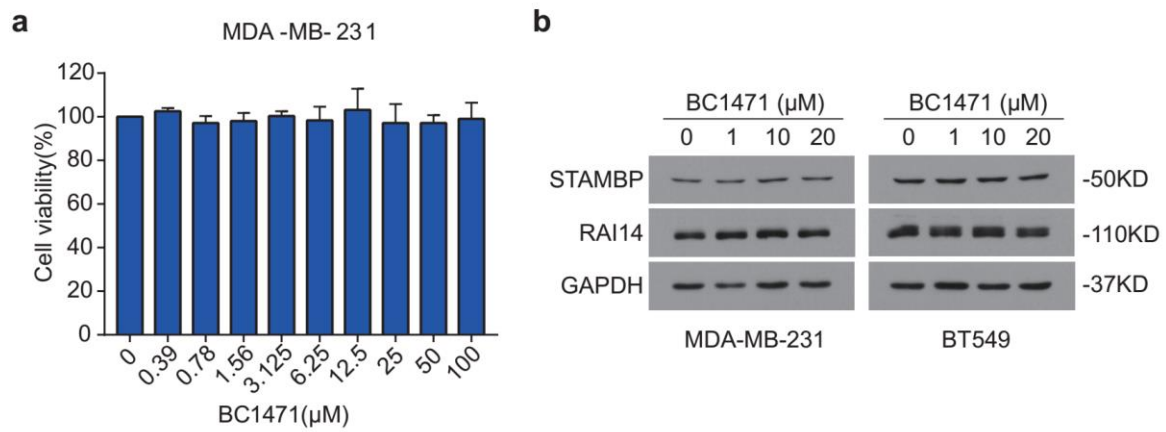

41

42 **Supplementary Fig. 6 Effects of BC1471 in TNBC cells.**

43 **a** MDA-MB-231 cells were treated with the indicated doses of BC1471 for 72 h, and then cell  
 44 proliferation was determined by MTS assay. **b** MDA-MB-231 and BT549 cells were treated  
 45 with the indicated doses of BC1471 for 24 h. The protein levels of STAMBP and RAI14 were  
 46 measured by Western blot.

47

48

49

50 **Supplementary Table 1 The primer sequences used for PCR in this study.**

| Gene name | Forward Sequence        | Reverse Sequence        |
|-----------|-------------------------|-------------------------|
| STAMPB    | CGGTAGAGGTGAATGAAGACAT  | TGTTGCCTTCCTCAGAGTAAAT  |
| RAI14     | GGCAGAACTGGTATGCTTAAAC  | TCCTCGTATTTGCTCTGAGTTT  |
| GAPDH     | TCCCATCACCATCTTCCA      | CATCACGCCACAGTTTCC      |
| ITGB1     | GGATTCTCCAGAAGGTGGTTTCG | TGCCACCAAGTTTCCCATCTCC  |
| ADAM8     | TGCTGGAGGTGGTGAATCACGT  | TCAGGAGGTTCTCCAGTGTGAC  |
| ITGB5     | GCCTTTCTGTGAGTGCGACAAC  | CCGATGTAACCTGCATGGCACT  |
| SEMA7A    | CTTCTTCCGAGAGGACAATCCTG | GTGTTCCACTTGGAGACTGACAG |
| TWF1      | CCCAAGGATTCAGCTCGTTACC  | GCTAGAATACAGCATCCGCTCTC |
| EPHA2     | ACTGCCAGTGTGAGCATCAACC  | GTGACCTCGTACTTCCCACTC   |
| LASP1     | CTTCGCCTCAAGCAACAGAGTG  | TGTCTGCCACTACGCTGAAACC  |
| TES       | GTGGCAGACATTACTGTGACAGC | CAGCAGAAGTGTTTCAGGTGCC  |
| CNN2      | GGTGGACATTGGCGTCAAGTAC  | GGGTCATAGAGATGCCTTCTCG  |
| SH3GL1    | CGGCGAGTCCAACCTTTGGTGAC | CTCCTTCAGGTCTTTCTCGCAC  |
| ITGA5     | GCCGATTCACATCGCTCTCAAC  | GTCTTCTCCACAGTCCAGCAAG  |
| CCN1      | GGAAAAGGCAGCTCACTGAAGC  | GGAGATACCAGTTCACAGGTC   |
| FSCN1     | GACACCAAAAAGTGTGCCTTCCG | CAAACCTTGCCATTGGACGCCCT |
| CALR      | TCAAGGAGCAGTTTCTGGACGG  | GCATCCTGGCTTGTCTGCAAAC  |
| SERBP1    | AGAAAGGCGACCACCTCGTGAA  | ACCTCTTCCAAGACCACCACGA  |
| HSPA5     | CTGTCCAGGCTGGTGTGCTCT   | CTTGGTAGGCACCACTGTGTTC  |

---

|         |                         |                         |
|---------|-------------------------|-------------------------|
| HSPA8   | TCCTACCAAGCAGACACAGACC  | CAGGAGGTATGCCTGTGAGTTC  |
| BSG     | GGCTGTGAAGTCGTCAGAACAC  | ACCTGCTCTCGGAGCCGTTCA   |
| DSP     | TGACAGACCGCTGGCAAAGGAT  | GGCGTTTAGCATCATAGAGCCAC |
| KRT18   | GCTGGAAGATGGCGAGGACTTT  | TGGTCTCAGACACCACTTTGCC  |
| LRRC59  | TCCAGCACCTGGATCTCCTCAA  | TCATCCAAGCAGTCACCTGCCA  |
| SEPTIN2 | GGTGACGCTATCAACTGCAGAG  | ATGATGTGCCGCCTGTTCAAGC  |
| EIF2A   | CTGGACCTCATGCAGCTTTAGC  | CTCCATAGTAGGAAGCTCCTGTC |
| DBN1    | CACCTACCAGAAGACGGATGCA  | TGCTCGAACCTGAGCCTCTCAT  |
| DIAPH3  | GATGAAACACGGTTGGCAGAGTC | ACTGCTCAGGTTACATAAGTTGC |

---

51

52
